# Supplementary material for: Delineating the Spectrum of Genetic Variants Associated with Bardet-Biedl Syndrome in Consanguineous Pakistani Pedigrees
Source: MDPI journal article supplement (doi:10.3390/genes14020404), 2023-02-03
Supplement: s1 [file s1]

Supplementary Table S3: Haplotype of intragenic variants across the *BBS6/MKKS* and *BBS7* common variants

**MKKS(NM\_170784.3): c.774delA, p.Thr259LeuTer21**

| Family ID | LUBS01                            | LUBS02                            | LUBS09                            |
|-----------|-----------------------------------|-----------------------------------|-----------------------------------|
|           | rs575534                          | rs575534                          |                                   |
|           | rs652633                          | rs652633                          |                                   |
|           | rs524625                          | rs524625                          |                                   |
|           | rs683145                          | rs683145                          |                                   |
|           | <b>MKKS(NM_170784.3):c.774del</b> | <b>MKKS(NM_170784.3):c.774del</b> | <b>MKKS(NM_170784.3):c.774del</b> |
|           | rs1051419                         | rs1051419                         | rs1051419                         |
|           | rs1131695                         | rs1131695                         | rs1131695                         |
|           | rs1431433                         | rs1431433                         | rs1431433                         |
|           | rs243887                          | rs243887                          |                                   |

Families LUBS01 and LUBS02 share a common region of 3'033'925 bp

Family LUBS09 shares a region of 2'636'377 bp with families LUBS01 and LUBS02

**BBS7(NM\_176824.3):c.580 582del**

| Family ID | CB03       | CB04       |
|-----------|------------|------------|
|           | rs3733526  | rs3733526  |
|           | rs343192   | rs343192   |
|           | rs34766411 | rs34766411 |
|           | rs1397645  | rs1397645  |
|           | rs3733559  | rs3733559  |
|           | rs2276959  | rs2276959  |

|                                       |                                       |
|---------------------------------------|---------------------------------------|
| rs71599153                            | rs71599153                            |
| rs4370153                             | rs4370153                             |
| rs769242                              | rs769242                              |
| <b>BBS7(NM_176824.3):c.580_582del</b> | <b>BBS7(NM_176824.3):c.580_582del</b> |
| rs1396082                             | rs1396082                             |
| rs4833837                             | rs4833837                             |
| rs13134412                            | rs13134412                            |
| rs1472949                             | rs1472949                             |
| rs199504785                           | rs199504785                           |
| rs750377319                           | rs750377319                           |

**Families CB03 and CB04 share a haplotype of 5063463 bp long**
