# Supplementary material for: Delineating the Spectrum of Genetic Variants Associated with Bardet-Biedl Syndrome in Consanguineous Pakistani Pedigrees
Source: MDPI journal article supplement (doi:10.3390/genes14020404), 2023-02-03
Supplement: s1 [file s1]

## Supplementary Table S2

Predictions of bioinformatics tools for variants segregating in families affected with Bardet-Biedl syndrome (BBS)

| Family Identity                                    | Genes         | Variants                           | Provean        | Sift           | Polyphen2,      | Mutation taster      |
|----------------------------------------------------|---------------|------------------------------------|----------------|----------------|-----------------|----------------------|
| <b>LUBS-01</b><br><b>LUBS-02</b><br><b>LUBS-09</b> | BBS6/<br>MKKS | c.775delA,<br>p.Thr259LeuTer2<br>1 | Deleterious    | Not applicable | Disease causing | Not applicable       |
| <b>LUBS-03</b>                                     | BBS6/<br>MKKS | c.748G>A,<br>p.gly250Arg           | Deleterious    | Damaging       | Disease causing | Probably<br>Damaging |
| <b>LUBS-04</b>                                     | BBS9          | c.223C>T,<br>p.Arg75Ter            | Deleterious    | Not applicable | Disease causing | Not applicable       |
| <b>LUBS-05</b>                                     | BBS1          | c.1150 C>T,<br>p.Glu384Ter         | Stop gain      | Deleterious    | Not applicable  | Disease causing      |
| <b>LUBS-06</b>                                     | BBS2          | c.471 +1G>A                        | Splicing error | Splicing error | Splicing error  | Splicing error       |
| <b>LUBS-10</b>                                     | BBS9          | c.252delA,<br>p.Lys85SerTer39      | Deleterious    | Not applicable | Disease causing | Not applicable       |
| <b>CB-03</b><br><b>CB-44</b>                       | BBS7          | c.580delGCA,<br>p.Ala194del        | Deleterious    | Damaging       | Disease causing | Probably<br>Damaging |
| <b>VI-65</b>                                       | ARL6          | c.387_394delAA<br>ATAAAA           | Deleterious    | Not applicable | Disease causing | Not applicable       |
| <b>RP-04</b>                                       | MKKS          | 1226G>A,<br>p.Gly409Glu            | Deleterious    | Damaging       | Disease causing | Probably<br>Damaging |
