# Supplementary material for: Delineating the Spectrum of Genetic Variants Associated with Bardet-Biedl Syndrome in Consanguineous Pakistani Pedigrees
Source: MDPI journal article supplement (doi:10.3390/genes14020404), 2023-02-03
Supplement: s1 [file s1]

Supplementary Table S1: Sequencing primers used for selected exons of BBS genes.

| GENE | PRIMER  | SEQUENCE                                                 |
|------|---------|----------------------------------------------------------|
| BBS1 | EXON 12 | TTCCCCAGGCCTGTCTCTAT<br>AGGCCTAGCTCCAGAAGGAC             |
| BBS2 | EXON 3  | TCAAAATCTGCTCAGTTTACTCAA<br>CACAAAACACGAATGAATGCT        |
| BBS3 | EXON 7  | TGCCTAACAGTGTGACAGTATGTG<br>TGTA AAAACCTACAATGCCACAA     |
| BBS6 | EXON 3  | TCCACTGTATTACCTGGGATACTC<br>GGCACAGGACAAGATCTACG         |
| BBS6 | EXON 5  | TGTTCTTTTGTAATTAAAATCACACTC<br>CAGTGTTAAAGGCTACAAGTTTACC |
| BBS7 | EXON 6  | ATGCAAGTTGTATTCGTAACCTAA<br>AAAAGTTCAATAACTCGTGCTGT      |
| BBS9 | EXON 4  | GAATTGTTTTGTTTACTCACAGTGG<br>TGGGAAAATGTTAACCAAGACA      |
